# Supplementary material
Source: bioRxiv or medRxiv preprint supplement (https://www.biorxiv.org/highwire/filestream/48481/field_highwire_adjunct_files/0/162925-1.pdf)
Supplement: Supplementary file [file 162925-1.pdf]

**Supplementary Information for “Anterolateral entorhinal-hippocampal imbalance in older adults disrupts object pattern separation”**

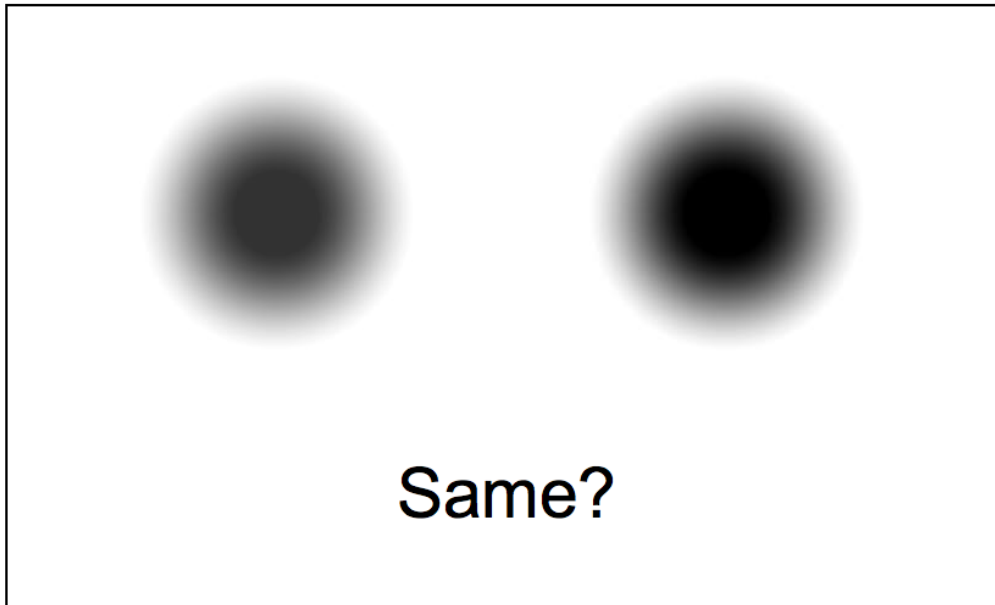

**Supplementary Figure 1: Example of a perceptual matching trial, which served as a baseline in fMRI analyses.** Participants had three seconds to look at the two blurred dots and indicate via button press whether the two were equally shaded.

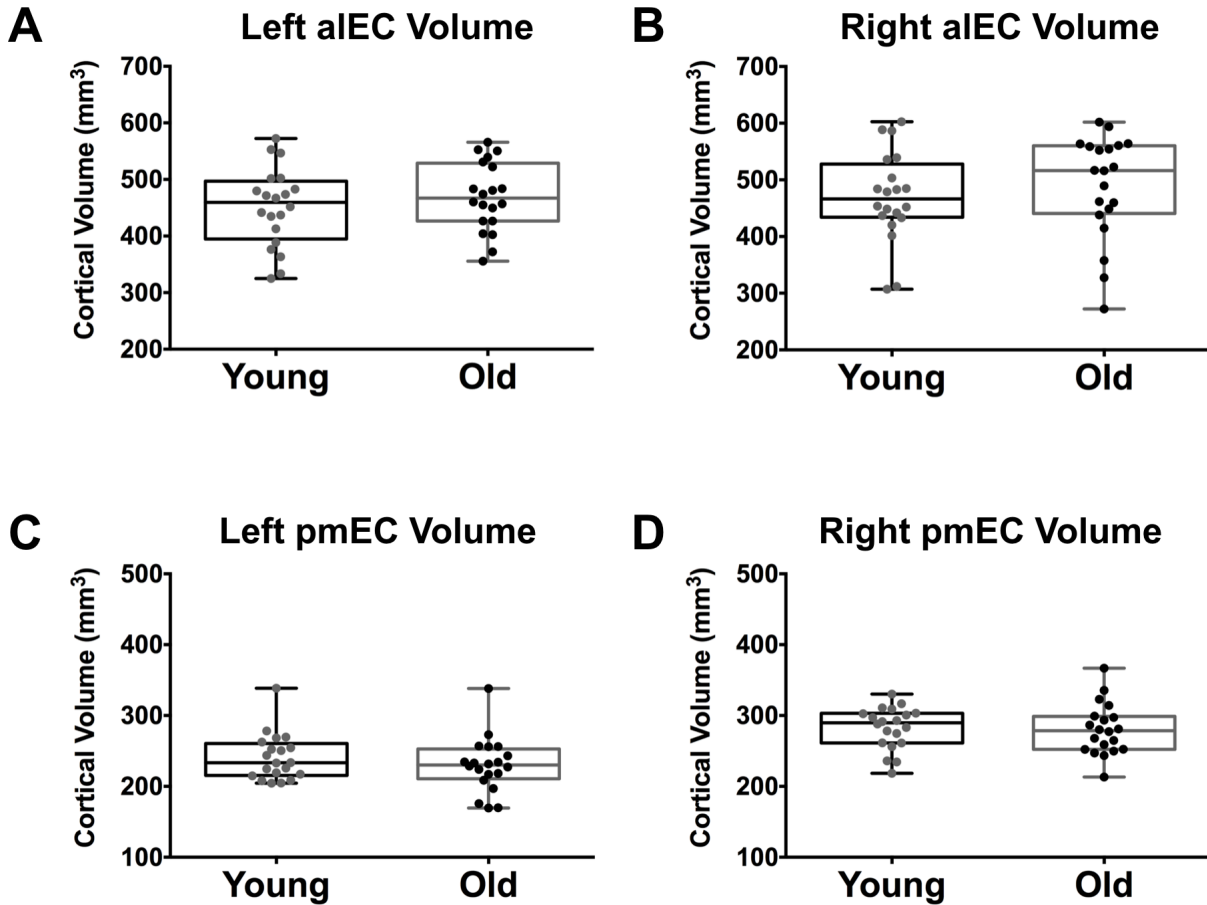

**Supplementary Figure 2: Cortical volume measurements across young and old participants.** Multi-atlas label fusion was used as a data-driven approach to labeling individual subjects' brains with our ROIs (see Methods for details), and estimates of volume for each ROI (in  $\text{mm}^3$ ) were extracted. No group differences were observed in A) left aLEC, B) right aLEC, C) left pMEC, or D) right pMEC.

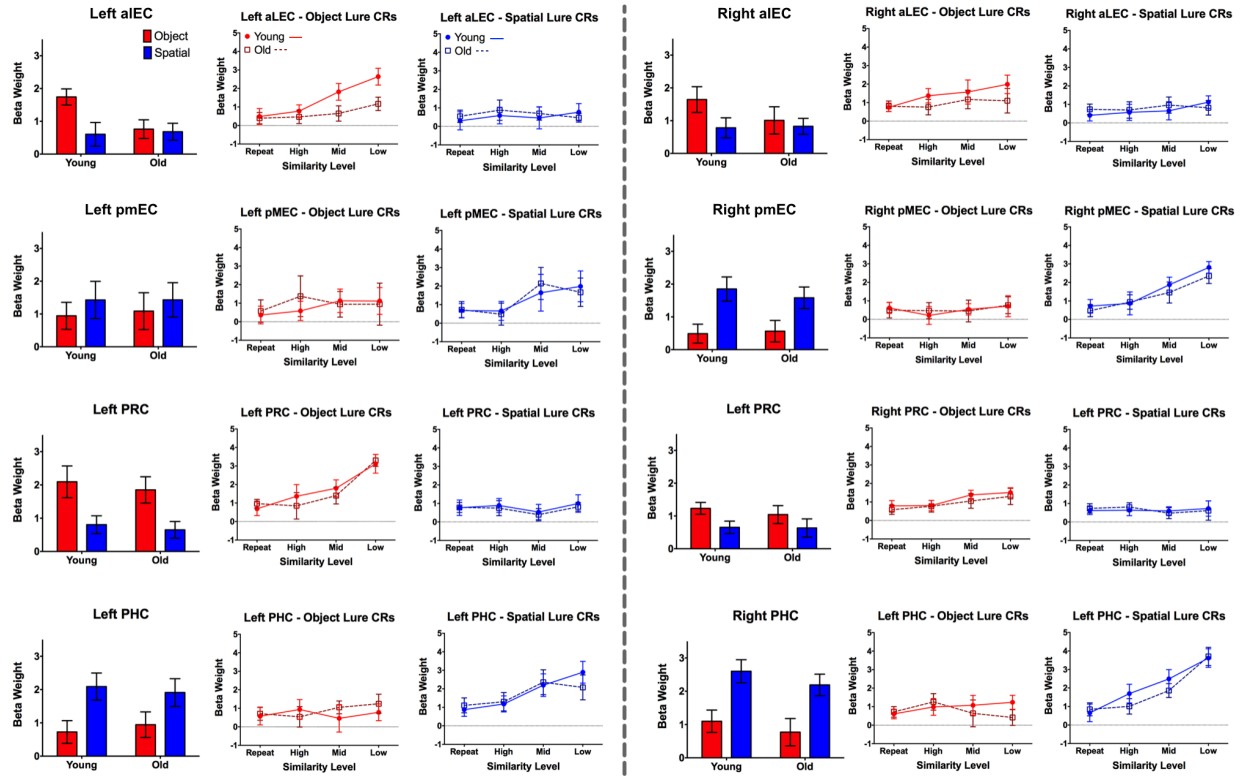

**Supplementary Figure 3: All cortical ROIs (bilateral aLEC, pMEC, PRC, and PHC) as engaged by object and spatial discrimination in the task.**

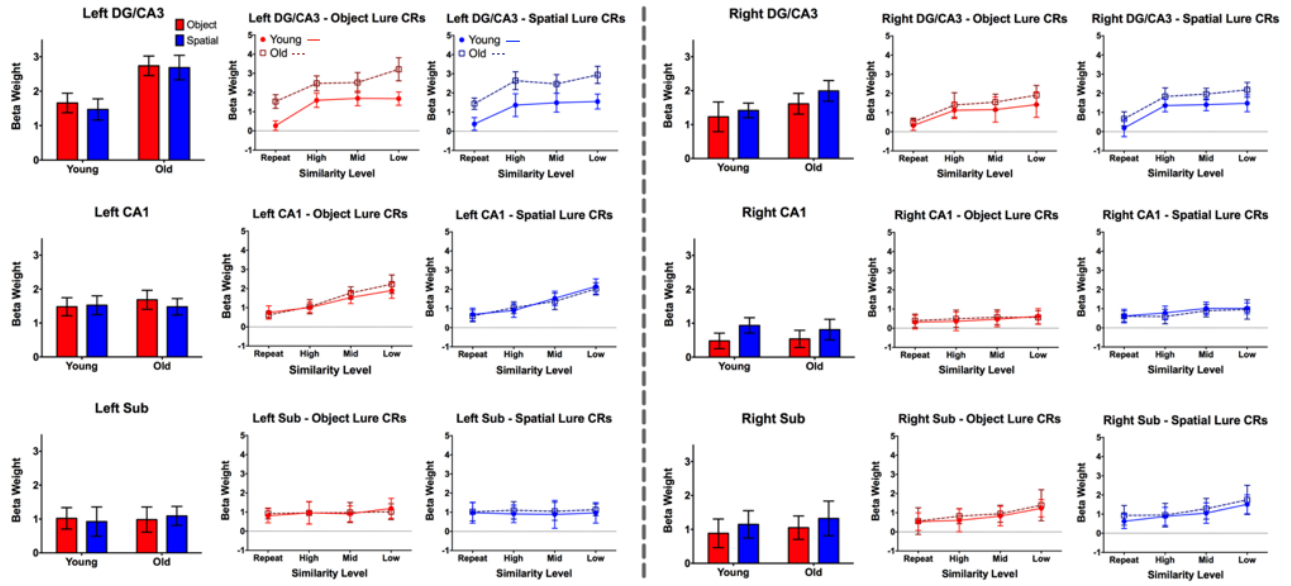

**Supplementary Figure 4: All hippocampal ROIs (bilateral DG/CA3, CA1, and subiculum) as engaged by object and spatial discrimination in the task.**

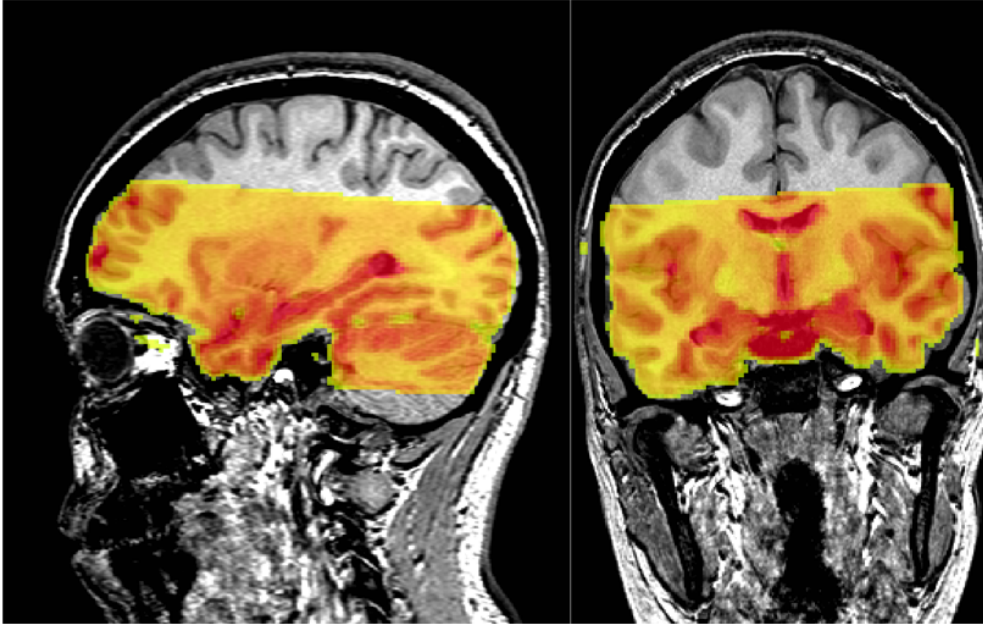

**Supplementary Figure 5: Coverage of our 1.8 isotropic EPI volume in an example subject.**

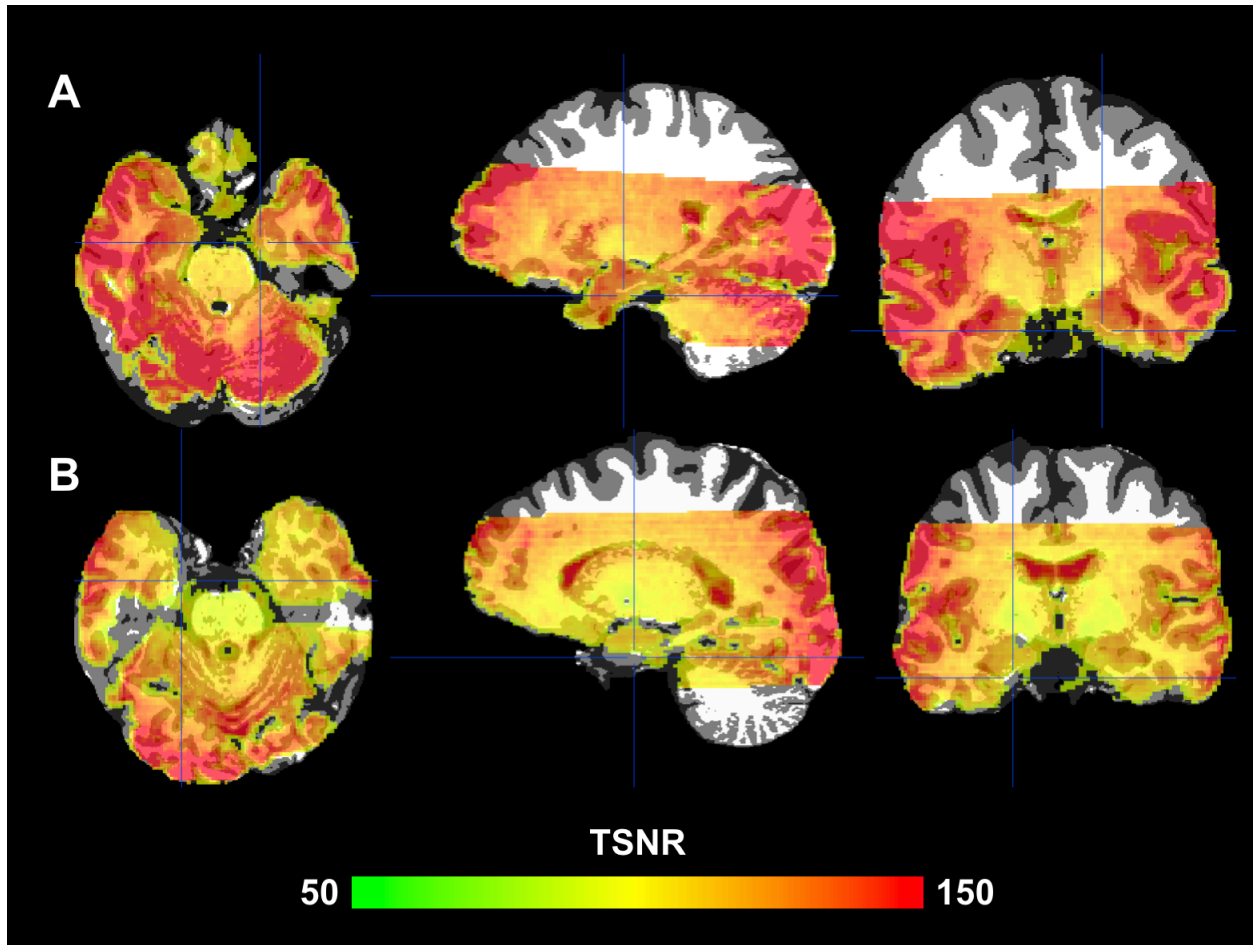

**Supplementary Figure 6: Examples of TSNR maps obtained from two representative young subjects.** Subjects with A) relatively good, and B) relatively poor TSNR in the MTL are shown. Note the “missing” voxels with TSNR < 50 in the EC, focused by the crosshairs.

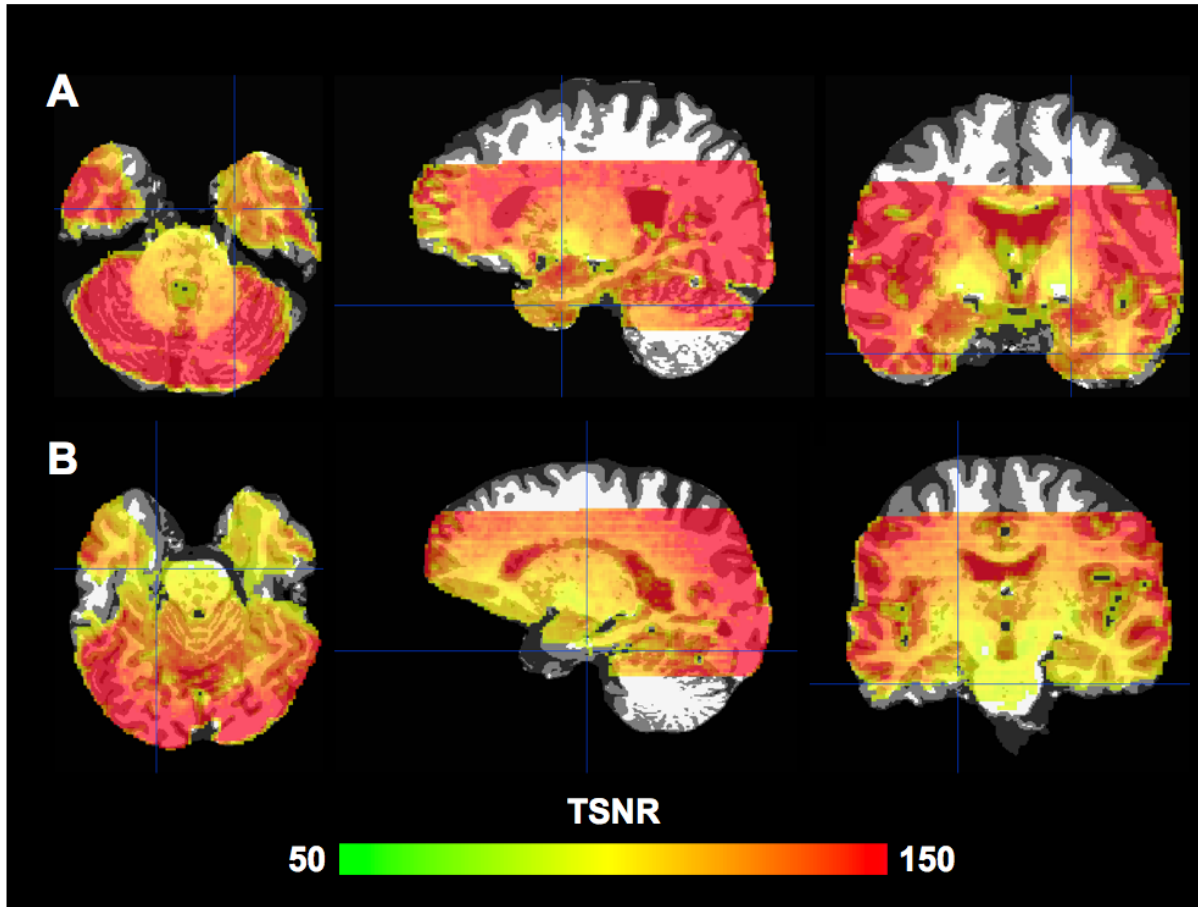

**Supplementary Figure 7: Examples of TSNR maps obtained from two representative older subjects.** Subjects with A) relatively good, and B) relatively poor TSNR in the MTL are shown. Note the “missing” voxels with TSNR < 50 in the EC, focused by the crosshairs.

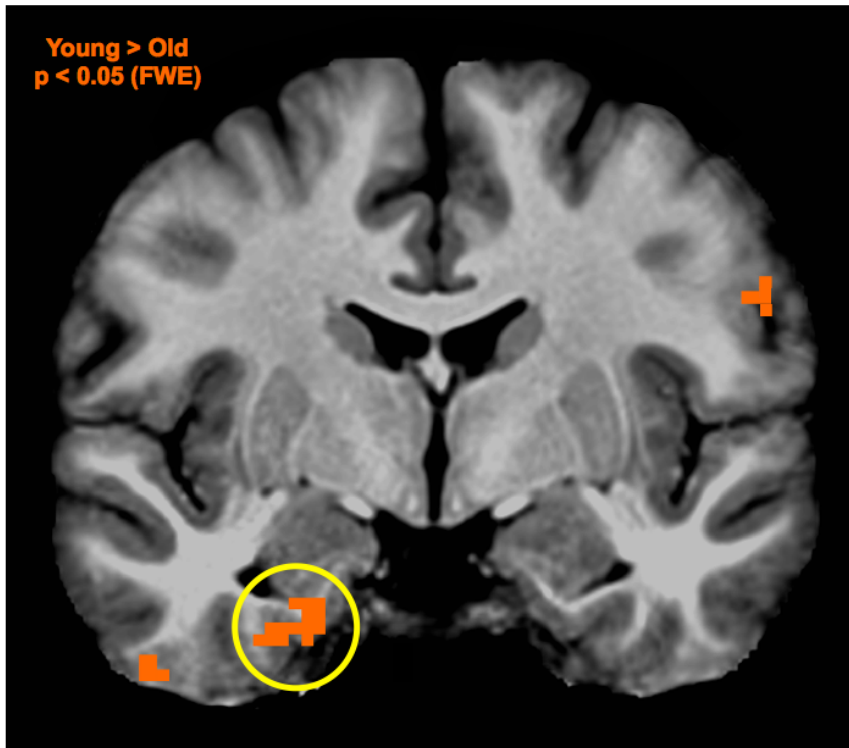

**Supplementary Figure 8: Contrast (t-test) of voxels showing greater activity in young adults compared to older adults during object discrimination (collapsed across similarity).** Data were corrected to control familywise error (FWE) at a level of  $p < 0.05$ . A significant cluster of voxels was observed spanning left aLEC and PRC.



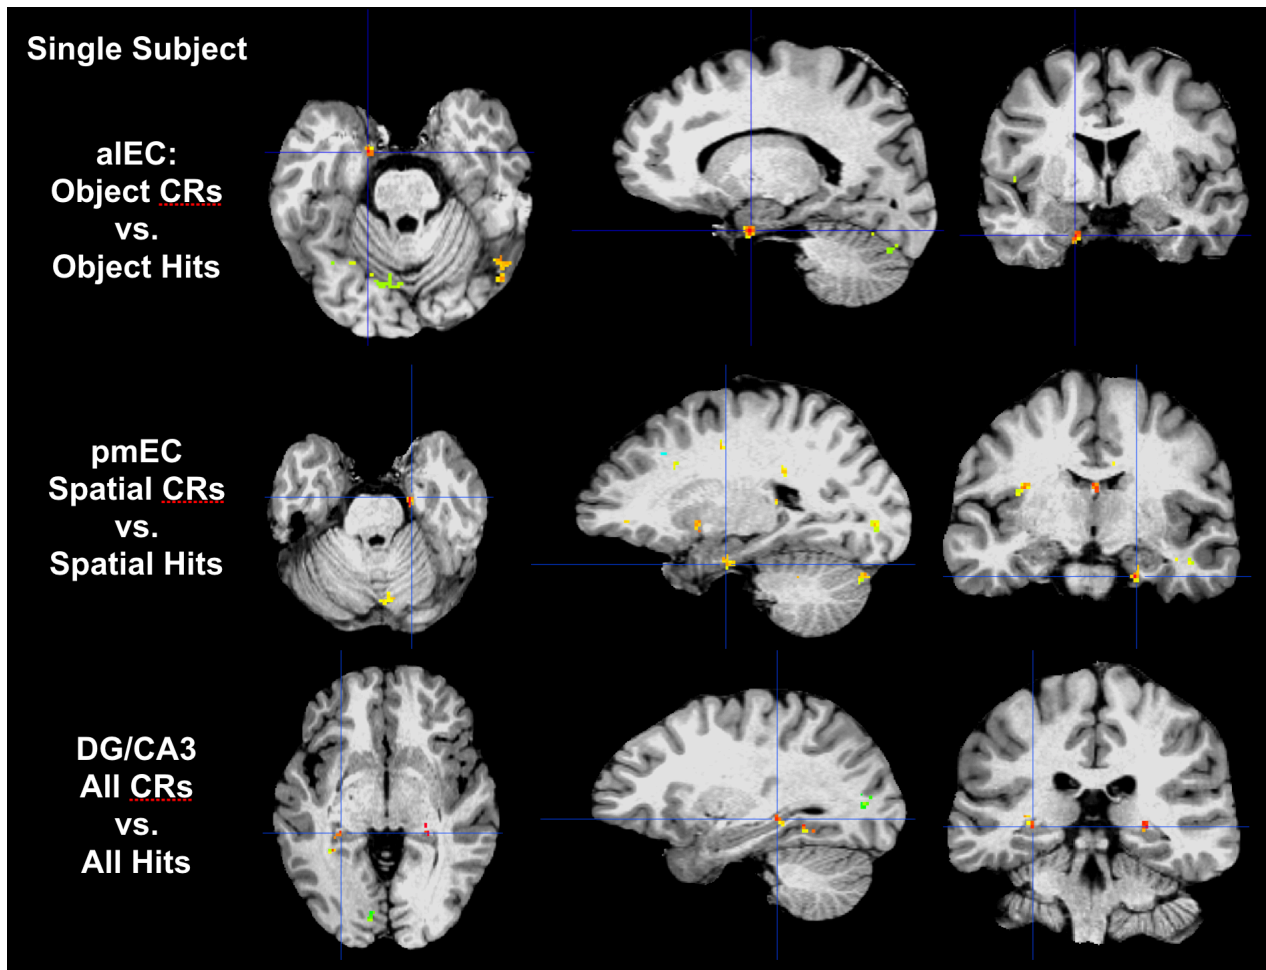

**Supplementary Figure 9: Example single-subject contrasts in three representative young participants.** A) Contrasting object discrimination versus object recognition in a single subject at  $p < 0.05$  corrected reveals a significant cluster in left aLEC. B) Contrasting spatial discrimination versus object recognition in a single subject at  $p < 0.05$  corrected reveals a significant cluster in right pMEC. C) Contrasting discrimination versus recognition collapsed across test domains at  $p < 0.05$  corrected reveals significant clusters bilaterally in DG/CA3. (CR = correct rejection; data were corrected for false discovery rate (FDR) at the level of single subject beta weight maps.)

**Supplementary Table 1: Age and Domain Effects, Collapsed Across Similarity.**

| Region      | Age          |              | Test Domain  |                  | Interaction  |              |
|-------------|--------------|--------------|--------------|------------------|--------------|--------------|
|             | F(1,38)      | p            | F(1,38)      | p                | F(1,38)      | p            |
| L aLEC      | 1.801        | 0.186        | <b>6.683</b> | <b>0.014</b>     | <b>5.071</b> | <b>0.031</b> |
| R aLEC      | 0.725        | 0.399        | 2.264        | 0.141            | 0.959        | 0.334        |
| L pMEC      | 0.015        | 0.902        | 0.905        | 0.348            | 0.026        | 0.872        |
| R pMEC      | 0.075        | 0.786        | <b>15.22</b> | <b>&lt;0.001</b> | 0.317        | 0.577        |
| L PRC       | 0.265        | 0.609        | <b>14.29</b> | <b>&lt;0.001</b> | 0.018        | 0.894        |
| R PRC       | 0.123        | 0.663        | <b>4.624</b> | <b>0.038</b>     | 0.135        | 0.715        |
| L PHC       | 0.002        | 0.966        | <b>15.79</b> | <b>&lt;0.001</b> | 0.462        | 0.501        |
| R PHC       | 0.744        | 0.394        | <b>30.55</b> | <b>&lt;0.001</b> | 0.024        | 0.877        |
| L DG/CA3    | <b>10.89</b> | <b>0.002</b> | 0.205        | 0.653            | 0.066        | 0.798        |
| R DG/CA3    | 1.979        | 0.168        | 0.846        | 0.366            | 0.095        | 0.76         |
| L CA1       | 0.061        | 0.806        | 0.177        | 0.677            | 0.418        | 0.522        |
| R CA1       | 0.014        | 0.906        | 2.575        | 0.117            | 0.157        | 0.694        |
| L Subiculum | 0.031        | 0.862        | <0.001       | 0.985            | 0.093        | 0.762        |
| R Subiculum | 0.155        | 0.696        | 0.412        | 0.525            | <0.001       | 0.991        |

Regional effects, comparing test domains and collapsed across lure similarity. F-statistics and p-values are presented for two-way (Age x Test Domain) mixed ANOVAs across ROIs. Significant effects are bolded.

**Supplementary Table 2: Age and Similarity Effects – Object Trials.**

| Region      | Age          |              | Object Similarity |                  | Interaction |       |
|-------------|--------------|--------------|-------------------|------------------|-------------|-------|
|             | F(1,38)      | p            | F(3,114)          | p                | F(3,114)    | p     |
| L aLEC      | <b>4.613</b> | <b>0.038</b> | <b>7.192</b>      | <b>&lt;0.001</b> | 1.805       | 0.15  |
| R aLEC      | 1.005        | 0.322        | 1.429             | 0.238            | 0.489       | 0.691 |
| L pMEC      | 0.069        | 0.795        | 0.28              | 0.839            | 0.195       | 0.899 |
| R pMEC      | 0.005        | 0.942        | 0.286             | 0.836            | 0.08        | 0.971 |
| L PRC       | 0.051        | 0.822        | <b>15.68</b>      | <b>&lt;0.001</b> | 0.558       | 0.644 |
| R PRC       | 0.447        | 0.508        | <b>3.011</b>      | <b>0.033</b>     | 0.092       | 0.965 |
| L PHC       | 0.162        | 0.689        | 0.279             | 0.84             | 0.532       | 0.661 |
| R PHC       | 0.224        | 0.639        | 0.523             | 0.668            | 0.91        | 0.439 |
| L DG/CA3    | <b>10.02</b> | <b>0.003</b> | <b>6.22</b>       | <b>&lt;0.001</b> | 0.382       | 0.767 |
| R DG/CA3    | 0.66         | 0.422        | 2.585             | 0.057            | 0.04        | 0.989 |
| L CA1       | 0.132        | 0.718        | <b>8.86</b>       | <b>&lt;0.001</b> | 0.247       | 0.863 |
| R CA1       | 0.039        | 0.844        | 0.153             | 0.928            | 0.025       | 0.995 |
| L Subiculum | <0.001       | 0.999        | 0.1               | 0.96             | 0.038       | 0.999 |
| R Subiculum | 0.07         | 0.792        | 0.845             | 0.472            | 0.013       | 0.998 |

Regional effects during object trials, considering similarity levels of items at test. F-statistics and p-values are presented for two-way (Age x Similarity) mixed ANOVAs across ROIs. Significant effects are bolded.

**Supplementary Table 3: Age and Similarity Effects – Spatial Trials.**

| Region      | Age         |              | Spatial Similarity |                  | Interaction |       |
|-------------|-------------|--------------|--------------------|------------------|-------------|-------|
|             | F(1,38)     | p            | F(3,114)           | p                | F(3,114)    | p     |
| L aLEC      | 0.075       | 0.786        | 0.228              | 0.876            | 0.279       | 0.84  |
| R aLEC      | 0.111       | 0.741        | 0.495              | 0.687            | 0.327       | 0.806 |
| L pMEC      | <0.001      | 0.984        | 2.519              | 0.062            | 0.161       | 0.922 |
| R pMEC      | 0.372       | 0.546        | <b>12.11</b>       | <b>&lt;0.001</b> | 0.23        | 0.875 |
| L PRC       | 0.121       | 0.73         | 0.644              | 0.588            | 0.033       | 0.992 |
| R PRC       | 0.003       | 0.961        | 0.152              | 0.928            | 0.14        | 0.936 |
| L PHC       | 0.024       | 0.877        | <b>4.818</b>       | <b>0.003</b>     | 0.538       | 0.657 |
| R PHC       | 0.35        | 0.558        | <b>21.46</b>       | <b>&lt;0.001</b> | 0.727       | 0.538 |
| L DG/CA3    | <b>9.01</b> | <b>0.004</b> | <b>4.345</b>       | <b>0.006</b>     | 0.111       | 0.954 |
| R DG/CA3    | 2.871       | 0.098        | <b>6.658</b>       | <b>&lt;0.001</b> | 0.046       | 0.987 |
| L CA1       | 0.026       | 0.872        | <b>8.502</b>       | <b>&lt;0.001</b> | 0.099       | 0.96  |
| R CA1       | 0.072       | 0.79         | 0.84               | 0.475            | 0.036       | 0.991 |
| L Subiculum | 0.079       | 0.78         | 0.011              | 0.998            | 0.001       | 0.999 |
| R Subiculum | 0.12        | 0.731        | 1.745              | 0.162            | 0.033       | 0.992 |

Regional effects during spatial trials, considering similarity levels of items at test. F-statistics and p-values are presented for two-way (Age x Similarity) mixed ANOVAs across ROIs. Significant effects are bolded.
